# Supplementary material
Source: PubMed Central journal article supplement (PMC8761189)

**Supplementary Table 1:** Demographic and clinical data for the ASC donors in this study. All patients were non-diabetic.

| <b>Patient</b> | <b>Age</b> | <b>Sex</b> | <b>BMI</b> | <b>Ethnicity / Race</b> |
|----------------|------------|------------|------------|-------------------------|
| <b>1</b>       | 45         | Female     | 41.1       | Black                   |
| <b>2</b>       | 42         | Female     | 41.4       | White, non-Hispanic     |
| <b>3</b>       | 30         | Female     | 43.0       | Black                   |
| <b>4</b>       | 37         | Female     | 40.8       | NA                      |
| <b>5</b>       | 43         | Female     | 41.7       | Hispanic                |
| <b>6</b>       | 33         | Female     | 36.9       | Black                   |
| <b>7</b>       | 40         | Female     | 42.5       | White, non-Hispanic     |

BMI, body mass index. NA, not available.

**Supplementary Figure 1:** Phase-contrast (*left*) and immunofluorescence (*right*) images of cells on coverslips. (a) CD31 (*green*) and nuclei (*blue*) stains of LECs and ASCs. (b) CD45 (*red*) and nuclei (*blue*) stains of monocytes and ASCs.

**Supplementary Figure 2:** Relative cumulative frequency distributions of initial (day 0) tumor-to-cavity distances. (a) For tumors in adipose cell-laden and cell-free collagen gels (Fig. 3). (b) For tumors in adipose cell-free collagen gels, treated with control or adipose cell-conditioned medium (Fig. 4). (c) For tumors that were formed in adipose cell-free collagen gels pretreated in control medium and fed with control medium ("*control* → *control*"), in gels pretreated in conditioned medium and fed with control medium ("*CM* → *control*"), and in gels pretreated in conditioned medium and fed with conditioned medium ("*CM* → *CM*") (Fig. 5). (d) For tumors in adipose cell-free collagen gels treated with conditioned medium from ASCs or adipose cells (Fig. 6).

**Supplementary Figure 3:** Physical properties of collagen gels. (a) Indentation modulus of adipose cell-free and adipose cell-laden collagen gels. (b) Darcy permeability of adipose cell-free and adipose cell-laden collagen gels. (c) Darcy permeability of adipose cell-free collagen gels that were treated with control or adipose cell-conditioned medium.

Supplementary Figure 1:

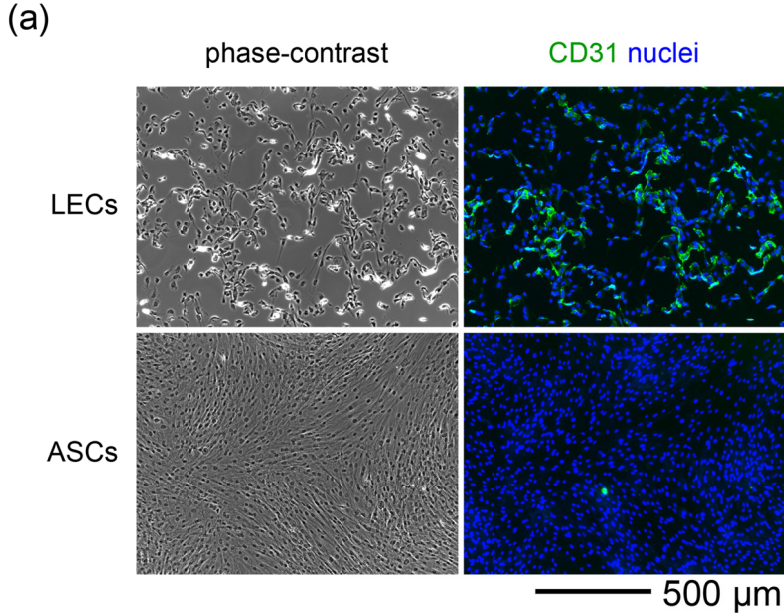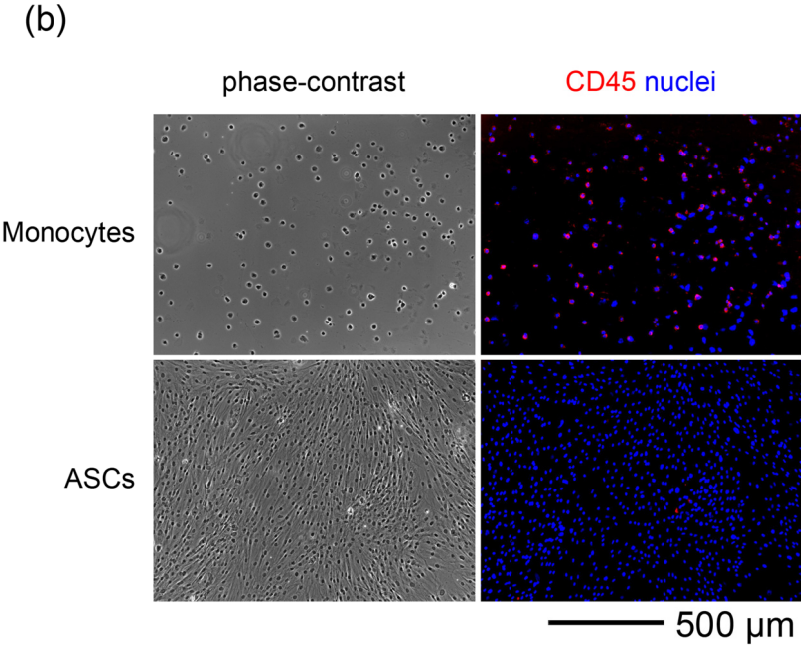

Supplementary Figure 2:

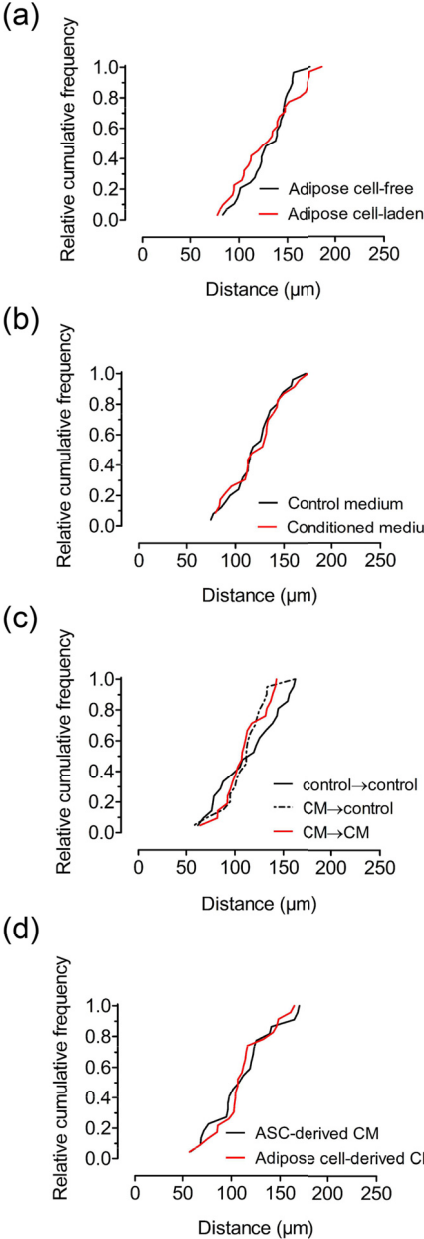

### Supplementary Figure 3:

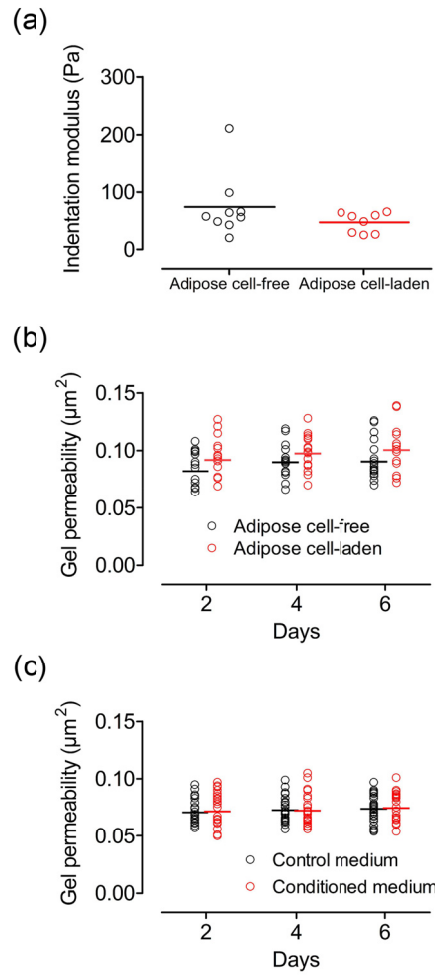

Supplement: 12195_2021_697_MOESM1_ESM.pdf [file 12195_2021_697_MOESM1_ESM.pdf]
